# Supplementary material for: Low Temperature Magnetic Transition of BiFeO3 Ceramics Sintered by Electric Field-Assisted Methods: Flash and Spark Plasma Sintering
Source: MDPI journal article supplement (doi:10.3390/ma16010189), 2022-12-25
Supplement: s1 [file s1]

Supplementary

# Low Temperature Magnetic Transition of BiFeO<sub>3</sub> Ceramics Sintered by Electric Field-Assisted Methods: Flash and Spark Plasma Sintering

Alejandro Fernando Manchón-Gordón \*, Antonio Perejón \*, Eva Gil-González, Maciej Kowalczyk, Pedro E. Sánchez-Jiménez and Luis A. Pérez-Maqueda

Figure S1 shows in situ XRD patterns of the BiFeO<sub>3</sub> sample sintered by SPS as a function of temperature (between 180 and 300 K) on cooling and heating at 10 K/min. All the studied samples exhibit the structure with R3c space group as a single phase in all the temperature studied range.

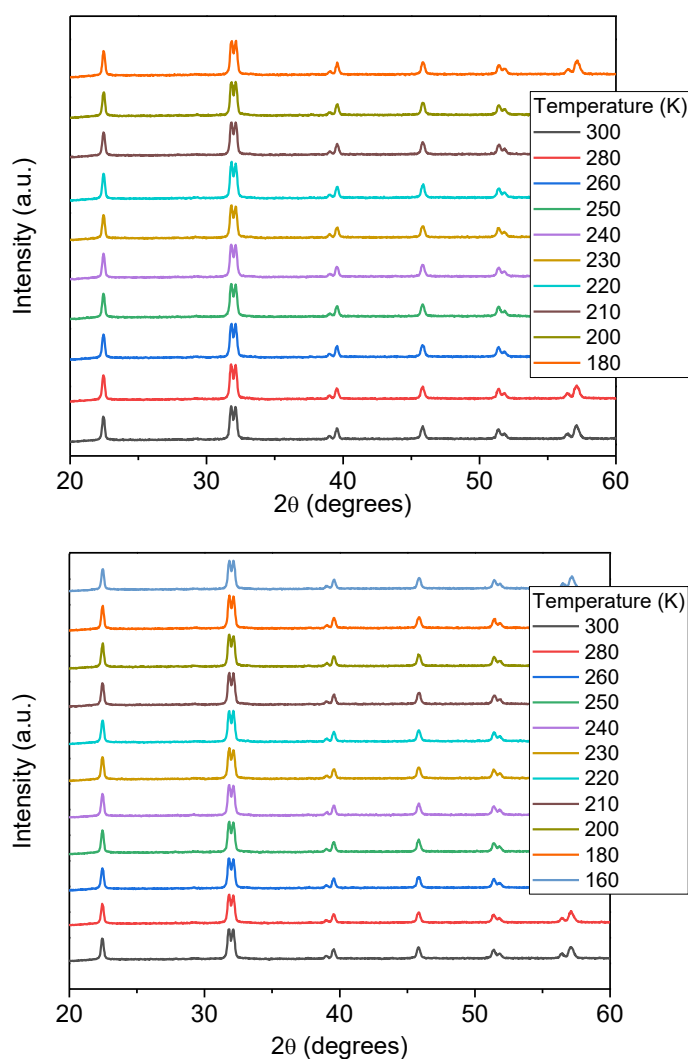

**Figure S1.** XRD patterns as a function of temperature from 300 to 180 K for the sample prepared by SPS on cooling (upper panel) and heating (lower panel).
